# Supplementary material
Source: PubMed Central journal article supplement (PMC7948261)
Supplement: advancesADV2020003129-suppl1.pdf [file advancesADV2020003129-suppl1.pdf]

Table 1: Taxa Differences between Indolent and Aggressive Lymphoma

| <i>ID</i>                          | <i>carriage.Indolent</i> | <i>carriage.Aggressive</i> | <i>rel.abund.median.Indolent</i> | <i>rel.abund.median.Aggressive</i> | <i>rel.abund.mean.Indolent</i> | <i>rel.abund.mean.Aggressive</i> | <i>rel.abund.sd.Indolent</i> | <i>rel.abund.sd.Aggressive</i> | <i>p.wil</i> |
|------------------------------------|--------------------------|----------------------------|----------------------------------|------------------------------------|--------------------------------|----------------------------------|------------------------------|--------------------------------|--------------|
| a00a0226a9c9306db073bb6e1acbd362   | 94.44444444              | 50                         | 0.133111436                      | 0.003449346                        | 0.297441145                    | 0.019703654                      | 0.276290527                  | 0.026982728                    | 0.001109541  |
| 9f05e4992392a05c38e1c790e07f3e5c   | 83.33333333              | 25                         | 0.060360769                      | 0                                  | 0.097919332                    | 0.003491002                      | 0.11014236                   | 0.006562859                    | 0.004170896  |
| a00a0226a9c9306db073bb6e1acbd3621  | 94.44444444              | 50                         | 0.129535517                      | 0.003449346                        | 0.292399537                    | 0.019703654                      | 0.280258374                  | 0.026982728                    | 0.001634519  |
| 23806803d9795a3a9def1fd5bc8576d7   | 77.77777778              | 12.5                       | 0.043105172                      | 0                                  | 0.088835748                    | 0.00237863                       | 0.122593101                  | 0.006727783                    | 0.003529461  |
| 1300fb2208dcb54d400995de3bc2eaa    | 72.22222222              | 0                          | 0.018603057                      | 0                                  | 0.074796261                    | 0                                | 0.112895301                  | 0                              | 0.002230532  |
| a07b639d9ec0fa332dd56799223782d2   | 55.55555556              | 100                        | 0.005713597                      | 0.058567515                        | 0.023131756                    | 0.083246877                      | 0.036117657                  | 0.09342607                     | 0.008760904  |
| 94adac1e5690b5aef26d6014e471f4581  | 100                      | 100                        | 0.439760521                      | 3.585570329                        | 1.095733706                    | 5.974904241                      | 1.383643086                  | 6.693128527                    | 0.015812837  |
| 084eb1b803972d886c7294ecb2676595   | 72.22222222              | 12.5                       | 0.041627102                      | 0                                  | 0.137306322                    | 0.003880515                      | 0.176762766                  | 0.010975753                    | 0.00713509   |
| d039fee9e93545befc0b24c6b1adb8a2   | 72.22222222              | 25                         | 0.056649885                      | 0                                  | 0.107535625                    | 0.002280321                      | 0.19181692                   | 0.004272948                    | 0.007224118  |
| 4c8288bfbfd76958c0c094d87b97650f81 | 94.44444444              | 100                        | 0.263020997                      | 2.194936                           | 3.608136377                    | 7.210723549                      | 9.590811815                  | 10.38340204                    | 0.030250756  |
| 3249d7b4a2797d6b8b3f892b43b638571  | 83.33333333              | 100                        | 0.097581156                      | 0.879583226                        | 1.735514498                    | 3.997426649                      | 3.504128559                  | 7.074919452                    | 0.037091155  |
| 94adac1e5690b5aef26d6014e471f458   | 100                      | 100                        | 0.515751207                      | 4.153715885                        | 1.283484645                    | 6.162807548                      | 1.670463034                  | 6.675689094                    | 0.022075499  |
| 6f0b4058c92e83c77533a218739a0e381  | 100                      | 100                        | 57.41594725                      | 35.48853349                        | 59.78044391                    | 43.68410094                      | 19.21517744                  | 22.53331846                    | 0.046987886  |
| 76aa915543cd876d620eaeaf9b9f7673   | 83.33333333              | 25                         | 0.348621338                      | 0                                  | 0.786775548                    | 0.105483496                      | 1.163184518                  | 0.254717                       | 0.011584646  |
| 3249d7b4a2797d6b8b3f892b43b638572  | 66.66666667              | 100                        | 0.083318879                      | 0.811862218                        | 1.712382743                    | 3.914179772                      | 3.495416745                  | 7.084269265                    | 0.047241483  |
| 6f0b4058c92e83c77533a218739a0e382  | 100                      | 100                        | 57.40887545                      | 35.48853349                        | 59.77663368                    | 43.68410094                      | 19.21748391                  | 22.53331846                    | 0.046987886  |
| 0a40068ba21819804b703b38e11e9c00   | 66.66666667              | 12.5                       | 0.022859099                      | 0                                  | 0.076113131                    | 0.004311683                      | 0.10634526                   | 0.012195281                    | 0.01619071   |
| 86b5603a79c587d59312beef52df34092  | 88.88888889              | 37.5                       | 0.469908021                      | 0                                  | 1.114642272                    | 0.395030198                      | 1.189793999                  | 0.989954515                    | 0.019914871  |
| 7949a6531e3cad4e887c8d260cde3ac8   | 100                      | 62.5                       | 0.515305422                      | 0.037232478                        | 0.709476626                    | 0.211610119                      | 0.726200193                  | 0.32336923                     | 0.021047372  |
| 5c41806f924fb1e703e71cf0d2414e601  | 44.44444444              | 87.5                       | 0                                | 0.051126142                        | 0.05110555                     | 0.12763924                       | 0.136652821                  | 0.235560395                    | 0.030280856  |
| 1941bdf9450a85f4069a80e526137af7   | 77.77777778              | 50                         | 1.554106485                      | 0.034493463                        | 1.866364515                    | 0.221703831                      | 1.752616699                  | 0.386913891                    | 0.029985726  |
| 6f0b4058c92e83c77533a218739a0e386  | 100                      | 100                        | 2.552737787                      | 0.360700358                        | 5.815131398                    | 1.229344103                      | 7.46889135                   | 1.721668312                    | 0.030250756  |
| 22436f090b3327aa9cc25a46c2614ab01  | 61.11111111              | 25                         | 0.244928921                      | 0                                  | 1.0669783                      | 0.032584224                      | 1.575099054                  | 0.065986646                    | 0.035054764  |
| 855166a7ea9905b7590e5e5fb7da78662  | 88.88888889              | 37.5                       | 0.084163157                      | 0                                  | 0.255906603                    | 0.186162977                      | 0.404868614                  | 0.486066568                    | 0.040611741  |
| 9f185911874fb5d5b2623b647359f33b1  | 33.33333333              | 87.5                       | 0                                | 0.018792599                        | 0.008497867                    | 0.645822167                      | 0.017060773                  | 1.595394707                    | 0.013741126  |
| d039fee9e93545befc0b24c6b1adb8a1   | 77.77777778              | 37.5                       | 0.083401722                      | 0                                  | 0.129030565                    | 0.011794843                      | 0.1904873                    | 0.026322534                    | 0.011584646  |
| 9f185911874fb5d5b2623b647359f33b   | 33.33333333              | 87.5                       | 0                                | 0.053089726                        | 0.011177939                    | 0.926366996                      | 0.022161445                  | 2.15157869                     | 0.006903773  |
| d039fee9e93545befc0b24c6b1adb8a    | 77.77777778              | 37.5                       | 0.083401722                      | 0                                  | 0.129030565                    | 0.011794843                      | 0.1904873                    | 0.026322534                    | 0.011584646  |
| 3249d7b4a2797d6b8b3f892b43b638574  | 66.66666667              | 100                        | 0.083318879                      | 0.811862218                        | 1.712023451                    | 3.911592762                      | 3.495575288                  | 7.083869608                    | 0.047241483  |
| 6f0b4058c92e83c77533a218739a0e384  | 100                      | 100                        | 6.448528282                      | 0.996852153                        | 9.546524429                    | 2.959614375                      | 10.15466607                  | 3.776131909                    | 0.040736746  |
| 3249d7b4a2797d6b8b3f892b43b638573  | 66.66666667              | 100                        | 0.083318879                      | 0.811862218                        | 1.712382743                    | 3.914179772                      | 3.495416745                  | 7.084269265                    | 0.047241483  |
| a07b639d9ec0fa332dd56799223782d21  | 44.44444444              | 87.5                       | 0                                | 0.043461189                        | 0.018059631                    | 0.060385556                      | 0.030650359                  | 0.069420488                    | 0.030280856  |
| c003202be6a53b07fbb26ecd2161fe2c   | 44.44444444              | 75                         | 0                                | 0.047082134                        | 0.02652804                     | 0.119732687                      | 0.090523464                  | 0.213807357                    | 0.037862243  |
| 3249d7b4a2797d6b8b3f892b43b638575  | 50                       | 87.5                       | 0.000964134                      | 0.080845                           | 0.757896667                    | 2.01531181                       | 2.62931151                   | 4.754876853                    | 0.039502395  |
| 94adac1e5690b5aef26d6014e471f4584  | 100                      | 100                        | 0.223339744                      | 3.297009882                        | 0.798165273                    | 4.140392989                      | 1.201148338                  | 3.551854041                    | 0.046987886  |
| 6f0b4058c92e83c77533a218739a0e385  | 100                      | 100                        | 4.576466104                      | 0.77560434                         | 8.637335259                    | 2.631502349                      | 9.400591976                  | 3.584559597                    | 0.030250756  |

Table 1: Taxa Differences between Indolent and Aggressive Lymphoma

| ID                               | Taxa Name                                                                                                       | p           | fdr         | Level   |
|----------------------------------|-----------------------------------------------------------------------------------------------------------------|-------------|-------------|---------|
| a00a0226a9c9306db073bb6e1acbd362 | p__Firmicutes; c__Clostridia; o__Clostridiales; f__Lachnospiraceae; g__Dorea; s__formicigenerans                | 0.001109541 | 0.062134306 | Species |
| 9f05e4992392a05c38e1c790e07f3e5c | p__Firmicutes; c__Clostridia; o__Clostridiales; f__; g__; s__                                                   | 0.004170896 | 0.091759715 | OTU     |
| a00a0226a9c9306db073bb6e1acbd362 | p__Firmicutes; c__Clostridia; o__Clostridiales; f__Lachnospiraceae; g__Dorea; s__formicigenerans                | 0.001634519 | 0.091759715 | OTU     |
| 23806803d9795a3a9def1fd5bc8576d7 | p__Firmicutes; c__Clostridia; o__Clostridiales; f__Lachnospiraceae; g__Dorea; s__                               | 0.003529461 | 0.091759715 | OTU     |
| 1300fb2208dccb54d400995de3bc2eaa | p__Firmicutes; c__Clostridia; o__Clostridiales; f__Lachnospiraceae; NA; NA                                      | 0.002230532 | 0.091759715 | OTU     |
| a07b639d9ec0fa332dd56799223782d2 | p__Actinobacteria; c__Actinobacteria; o__Actinomycetales; NA; NA; NA                                            | 0.008760904 | 0.102783441 | Order   |
| 94adac1e5690b5aef26d6014e471f458 | p__Firmicutes; c__Bacilli; o__Lactobacillales; NA; NA; NA                                                       | 0.015812837 | 0.102783441 | Order   |
| 084eb1b803972d886c7294ecb2676595 | p__Firmicutes; c__Clostridia; o__Clostridiales; f__Lachnospiraceae; g__; s__5                                   | 0.00713509  | 0.105953735 | OTU     |
| d039ffe9e93545befc0b24c6b1adb8a  | p__Firmicutes; c__Clostridia; o__Clostridiales; f__Lachnospiraceae; g__Anaerostipes; s__                        | 0.007224118 | 0.105953735 | OTU     |
| 4c2888bfbd76958c0c094d87b97650f8 | p__Proteobacteria; c__Gammaproteobacteria; NA; NA; NA; NA                                                       | 0.030250756 | 0.129216687 | Class   |
| 3249d7b4a2797d6b8b3f892b43b63857 | p__Actinobacteria; c__Actinobacteria; NA; NA; NA; NA                                                            | 0.037091155 | 0.129216687 | Class   |
| 94adac1e5690b5aef26d6014e471f458 | p__Firmicutes; c__Bacilli; NA; NA; NA; NA                                                                       | 0.022075499 | 0.129216687 | Class   |
| 6f0b4058c92e83c77533a218739a0e38 | p__Firmicutes; c__Clostridia; NA; NA; NA; NA                                                                    | 0.046987886 | 0.129216687 | Class   |
| 76aa915543cd876d620ebeaf9fd767   | p__Bacteroidetes; c__Bacteroidia; o__Bacteroidales; f__Porphyromonadaceae; g__Parabacteroides; s__              | 0.011584646 | 0.145635554 | OTU     |
| 3249d7b4a2797d6b8b3f892b43b63857 | p__Actinobacteria; c__Actinobacteria; o__Bifidobacteriales; NA; NA; NA                                          | 0.047241483 | 0.153534819 | Order   |
| 6f0b4058c92e83c77533a218739a0e38 | p__Firmicutes; c__Clostridia; o__Clostridiales; NA; NA; NA                                                      | 0.046987886 | 0.153534819 | Order   |
| 0a40068ba21819804b703b38e11e9c00 | p__Firmicutes; c__Clostridia; o__Clostridiales; f__Lachnospiraceae; g__Coprococcus; s__                         | 0.01619071  | 0.178097814 | OTU     |
| 86b5603a79c587d59312beef52df3409 | p__Firmicutes; c__Clostridia; o__Clostridiales; f__Lachnospiraceae; g__[Ruminococcus]; s__gnavus.1              | 0.019914871 | 0.185216874 | OTU     |
| 7949a6531e3cad4e887c8d260cde3ac8 | p__Firmicutes; c__Clostridia; o__Clostridiales; f__Lachnospiraceae; g__Blautia; s__3                            | 0.021047372 | 0.185216874 | OTU     |
| 5c41806f924fb1e703e71cf0d2414e60 | p__Firmicutes; c__Erysipelotrichi; o__Erysipelotrichales; f__Erysipelotrichaceae; g__[Eubacterium]; s__dolichum | 0.030280856 | 0.204978104 | OTU     |
| 1941bdf9450a85f4069a80e526137af7 | p__Firmicutes; c__Clostridia; o__Clostridiales; f__Ruminococcaceae; g__Faecalibacterium; s__prausnitzii.3       | 0.029985726 | 0.204978104 | OTU     |
| 6f0b4058c92e83c77533a218739a0e38 | p__Firmicutes; c__Clostridia; o__Clostridiales; f__Lachnospiraceae; g__Blautia; s__                             | 0.030250756 | 0.204978104 | OTU     |
| 22436f090b3327aa9cc25a46c2614ab0 | p__Bacteroidetes; c__Bacteroidia; o__Bacteroidales; f__Bacteroidaceae; g__Bacteroides; s__uniformis.1           | 0.035054764 | 0.220344229 | OTU     |
| 855166a7ea9905b7590e5e5fb7da7866 | p__Firmicutes; c__Clostridia; o__Clostridiales; f__Clostridiaceae; g__Clostridium; s__                          | 0.040611741 | 0.238255545 | OTU     |
| 9f185911874fb5d5b2623b647359f33b | p__Firmicutes; c__Clostridia; o__Clostridiales; f__Veillonellaceae; g__Veillonella; s__dispar                   | 0.013741126 | 0.256501022 | Species |
| d039ffe9e93545befc0b24c6b1adb8a  | p__Firmicutes; c__Clostridia; o__Clostridiales; f__Lachnospiraceae; g__Anaerostipes; s__                        | 0.011584646 | 0.256501022 | Species |
| 9f185911874fb5d5b2623b647359f33b | p__Firmicutes; c__Clostridia; o__Clostridiales; f__Veillonellaceae; g__Veillonella; NA                          | 0.006903773 | 0.260654542 | Genus   |
| d039ffe9e93545befc0b24c6b1adb8a  | p__Firmicutes; c__Clostridia; o__Clostridiales; f__Lachnospiraceae; g__Anaerostipes; NA                         | 0.011584646 | 0.260654542 | Genus   |
| 3249d7b4a2797d6b8b3f892b43b63857 | p__Actinobacteria; c__Actinobacteria; o__Bifidobacteriales; f__Bifidobacteriaceae; g__Bifidobacterium; NA       | 0.047241483 | 0.37423493  | Genus   |
| 6f0b4058c92e83c77533a218739a0e38 | p__Firmicutes; c__Clostridia; o__Clostridiales; f__Lachnospiraceae; g__Blautia; NA                              | 0.040736746 | 0.37423493  | Genus   |
| 3249d7b4a2797d6b8b3f892b43b63857 | p__Actinobacteria; c__Actinobacteria; o__Bifidobacteriales; f__Bifidobacteriaceae; NA; NA                       | 0.047241483 | 0.382096085 | Family  |
| a07b639d9ec0fa332dd56799223782d2 | p__Actinobacteria; c__Actinobacteria; o__Actinomycetales; f__Actinomycetaceae; NA; NA                           | 0.030280856 | 0.382096085 | Family  |
| c003202be6a53b07fbb26ecd2161fe2c | p__Firmicutes; c__Bacilli; o__Lactobacillales; f__Lactobacillaceae; NA; NA                                      | 0.037862243 | 0.382096085 | Family  |
| 3249d7b4a2797d6b8b3f892b43b63857 | p__Actinobacteria; c__Actinobacteria; o__Bifidobacteriales; f__Bifidobacteriaceae; g__Bifidobacterium; s__      | 0.039502395 | 0.423369313 | Species |
| 94adac1e5690b5aef26d6014e471f458 | p__Firmicutes; c__Bacilli; o__Lactobacillales; f__Streptococcaceae; g__Streptococcus; s__                       | 0.046987886 | 0.423369313 | Species |
| 6f0b4058c92e83c77533a218739a0e38 | p__Firmicutes; c__Clostridia; o__Clostridiales; f__Lachnospiraceae; g__Blautia; s__                             | 0.030250756 | 0.423369313 | Species |

Table 2: Demographic Distribution and Significance in MMC and Healthy Control Populations

|                  | <i>MMMCC</i>   | <i>Case</i>     | <i>Total</i>    | <i>P Value</i> |
|------------------|----------------|-----------------|-----------------|----------------|
| <i>Age</i>       |                |                 |                 | <b>0.127</b>   |
| <i>Mean (SD)</i> | 64.783 (8.236) | 61.420 (14.364) | 63.255 (11.502) |                |
| <i>Sex</i>       |                |                 |                 | <b>0.057</b>   |
| <i>F</i>         | 30 (50.0%)     | 16 (32.0%)      | 46 (41.8%)      |                |
| <i>M</i>         | 30 (50.0%)     | 34 (68.0%)      | 64 (58.2%)      |                |
| <i>BMI</i>       |                |                 |                 | <b>0.308</b>   |
| <i>Mean (SD)</i> | 28.750 (5.200) | 29.849 (6.051)  | 29.250 (5.603)  |                |
| <i>Race</i>      |                |                 |                 | <b>0.738</b>   |
| <i>Other</i>     | 6 (10.0%)      | 6 (12.0%)       | 12 (10.9%)      |                |
| <i>White</i>     | 54 (90.0%)     | 44 (88.0%)      | 98 (89.1%)      |                |
